# Supplementary material for: Fermented blueberry pomace ameliorates intestinal barrier function through the NF-κB-MLCK signaling pathway in high-fat diet mice
Source: Royal Society of Chemistry journal article supplement (doi:10.1039/c9fo02517k), 2020-01-01
Supplement: c9fo02517k1.pdf [file c9fo02517k1.pdf]

**The method of determining the content of protein, fat, moisture, ash, titratable acid, dietary fiber (soluble and insoluble) and carbohydrates (non-dietary fiber):**

According to GB5009.5-2016 (National Standard of the People's Republic of China), the FBP (2 g), CuSO<sub>4</sub> (0.4 g), K<sub>2</sub>SO<sub>4</sub> (6 g) and sulfuric acid (20 mL) were added into the digestive tube. Then the digestive tube was transferred to the digestion oven. The digestion will still continue for 1 h when the temperature of the digesting oven reached at 420°C. The 50 mL of distilled water was added to the cooled reaction solution. The protein content was detected by using kjeldahl apparatus, subsequently.

According to GB5009.5-2016 (National Standard of the People's Republic of China), the fat of FBP was extracted by petroleum ether for 10 h (8 times/h). After removing the organic phase, the FBP sample was dried and weighed to calculate the fat content.

The content of moisture, ash, titratable acid and dietary fiber (soluble and insoluble) was respectively determined according to GB5009.3-2016, GB5009.4-2016, GB5009.239-2016 and GB5009.88-2014 (National Standard of the People's Republic of China) without any modification.

According to previous studies<sup>1-3</sup>, the remaining difference to 100% was considered as being carbohydrates (non-dietary fiber).

**The method of phenolic compounds determination by using UPLC-MS:**

The FBP (500 mg) was dissolved in 400 mL of 60% ethanol. The phenolic extraction of FBP were subsequently extracted through ultrasound (480 W, 25°C, 1 h) and concentrated through evaporation. Then concentrated extraction (5 mL) were

applied to the C18 Sep-Pak cartridges (Waters, USA) to purify and collect the polyphenols. The phenolic extraction was obtained after the purify.

The specific phenolic compounds of phenolic extraction were detected through UPLC-MS system (Thermo Scientific Q Exactive, USA) with the 3200 V of appropriate spray voltage and 300°C of capillary temperature. ZORBAX Eclipse XDB-C18 column (50 mm×2.1 mm, 1.8 μm) was used with the 0.2 mL/min of flow rate and 30°C of the column temperature. Phase A (0.1% formic acid-acetonitrile) and phase B (0.1% formic acid-water) were used as the binary gradient. Gradient was as follows: 5% A at 0 min, 20% A at 6 min, 35% A at 15 min, 40% A at 20 min, 95% A at 24 min, 95% A at 27 min, 5% A at 35 min. Both positive and negative electrospray ionization modes were collected at the mass ranges of 80-1200 m/z. Standards (gallic acid, catechin, epicatechin, caffeic acid, protocatechuate, syringic acid, ferulic acid, quercetin, kaempferol, and malvidin), purchased from Yuanye Biotech Co., Ltd. (Shanghai, China), were used to quantify the phenolic compounds. Quercetin and malvidin were separately used as the equivalent of quercetin glycosides and anthocyanins. Results were analyzed by the Xcalibur software (Thermo Scientific, USA).

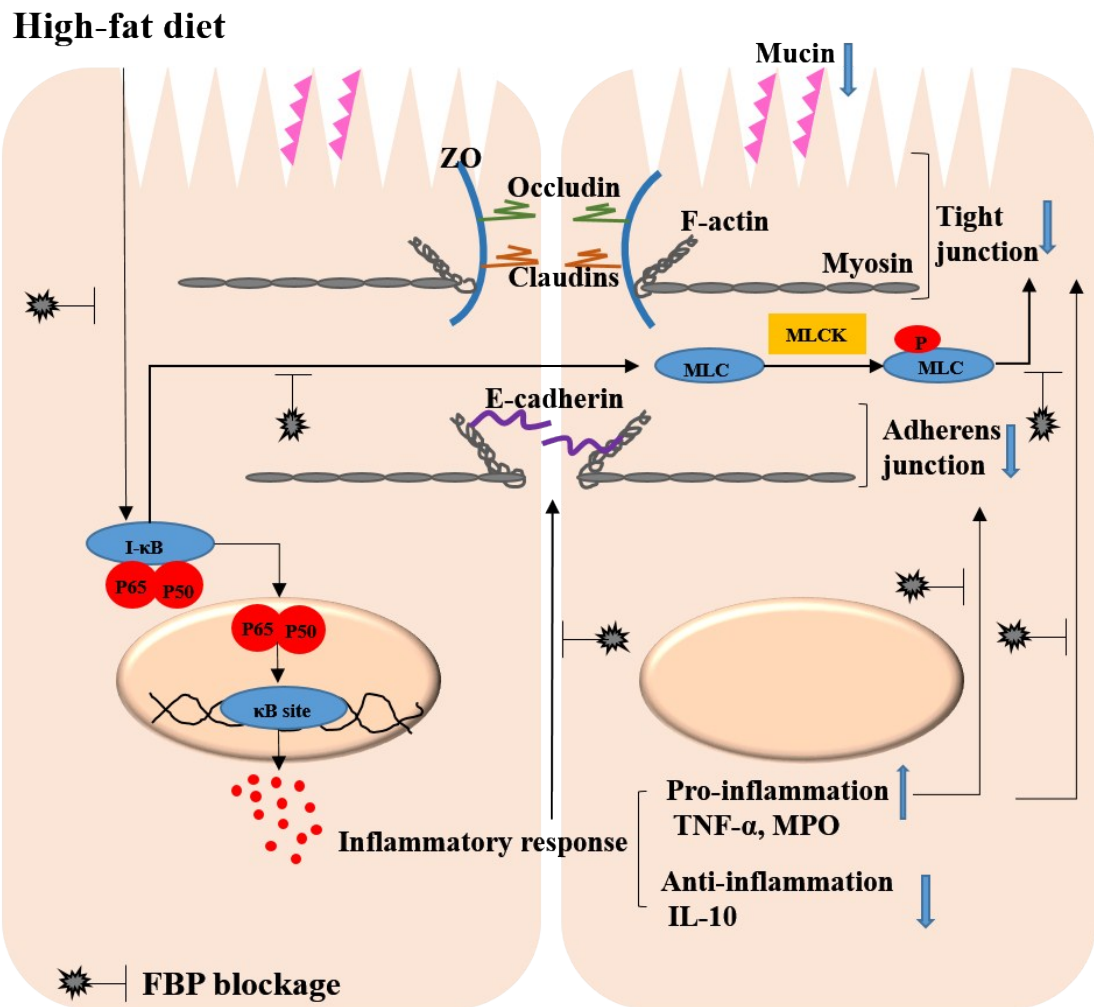

Supplementary Figure S1. Possible mechanism of FBP on small intestinal barrier function in HFD mice.

Supplementary Table S1. Ingredients of maintenance purified diet.

| Ingredient         | Feed ratio (g/kg)   |             |
|--------------------|---------------------|-------------|
|                    | TP23522             | TP23520     |
| Casein             | 190                 | 258         |
| Corn Starch        | 480                 | 0           |
| Maltodextrin       | 118                 | 162         |
| Sucrose            | 65                  | 89          |
| Soybean Oil        | 24                  | 32          |
| Lard               | 19                  | 317         |
| Cellulose          | 47                  | 65          |
| Mineral Mix, M1022 | 43                  | 58          |
| Vitamin Mix, V1000 | 9                   | 13          |
| L-Cystine          | 3                   | 4           |
| Choline Bitartrate | 2                   | 3           |
| TBHQ               | 0.01                | 0.07        |
|                    | Total: 1000         | Total: 1000 |
|                    | Feed heat ratio (%) |             |
|                    | TP23522             | TP23520     |
| Protein            | 20                  | 20          |
| Carbohydrate       | 70                  | 20          |
| fat                | 10                  | 60          |
|                    | Total: 100          | Total: 100  |
|                    | Feed heat (Kcal/g)  |             |
|                    | TP23522             | TP23520     |
|                    | 3.9                 | 5.3         |

Supplementary Table S2. Primers used in this research.

| Gene           | Primers                                                | Gene Bank ID/References |
|----------------|--------------------------------------------------------|-------------------------|
| $\beta$ -actin | F: GGCTGTATTCCCTCCATCG<br>R: CCAGTTGGTAACAATGCCATG     | 4                       |
| ZO-1           | F: CGGAACTATGACCATCGCCTAC<br>R: CTTCGGGATGTTGTCTGGAGTC | NM-001163574.1          |
| Claudin-1      | F: GGGCTGATCGCAATCTTTGTGT<br>R: CCACTAATGTCGCCAGACCTGA | NM-016674.4             |
| Claudin-4      | F: GGCTGAGCGATGGCGTCTAT<br>R: CGATGTTGCTGCCGATGAAGG    | NM-009903.2             |
| Occludin       | F: TTCCACACTTGCTTGGGACAGA<br>R: TCCGCCATAGCCATAGCCATAG | NM-0088756.2            |
| E-cadherin     | F: GCCATCGCCTACACCATCGT<br>R: GCAGCCTGAACCACCAGAGT     | NM-009864.3             |
| Muc 2          | F: ACGCCTGTGACCTCTCAATCC<br>R: CCGCTGATGAAGTGACGAATGG  | NM-023566.3             |
| NF- $\kappa$ B | F: GAGGTCTCTGGGGGTACCAT<br>R: TTGCGGAAGGATGTCTCCAC     | 5                       |
| MLCK           | F: CCCTTCCTTCTCTAGTGTTCTGA<br>R: AGCCTCACAGATGGATCGAG  | 6                       |

Supplementary Table S3. The approximate composition of FBP powder.

| Component                         | Content (g/kg) |
|-----------------------------------|----------------|
| Moisture                          | 23.6 ± 0.7     |
| Fat                               | 5.0 ± 0.2      |
| Protein                           | 114.5 ± 1.5    |
| Ash                               | 22.7 ± 0.5     |
| Titrateable acid                  | 2.7 ± 0.1      |
| Soluble dietary fiber             | 48.0 ± 0.1     |
| Insoluble dietary fiber           | 360.3 ± 2.2    |
| Carbohydrates (non-dietary fiber) | 423            |

Data expressed as mean ± standard deviation (n = 3). The content of carbohydrate (non-dietary fiber) was calculated by difference.

Supplementary Table S4. Body weight of mice during the five-week-feed.

| Group | Body weight (g)          |                          |                          |                         |                         |                         |
|-------|--------------------------|--------------------------|--------------------------|-------------------------|-------------------------|-------------------------|
|       | Initial                  | 1 Week                   | 2 Week                   | 3 Week                  | 4 Week                  | 5 Week                  |
| C     | 21.59 ±1.25 <sup>a</sup> | 23.61±1.93 <sup>ab</sup> | 23.74±0.65 <sup>a</sup>  | 23.84±0.57 <sup>a</sup> | 24.49±0.77 <sup>a</sup> | 25.10±0.54 <sup>a</sup> |
| CL    | 21.46 ±0.51 <sup>a</sup> | 23.31±1.55 <sup>a</sup>  | 23.58±1.52 <sup>a</sup>  | 23.81±0.81 <sup>a</sup> | 24.43±0.49 <sup>a</sup> | 25.32±0.32 <sup>a</sup> |
| CH    | 21.62 ±0.68 <sup>a</sup> | 22.88±0.47 <sup>a</sup>  | 23.29±0.46 <sup>a</sup>  | 23.94±0.65 <sup>a</sup> | 24.36±0.62 <sup>a</sup> | 25.23±0.56 <sup>a</sup> |
| HFD   | 21.97 ±1.14 <sup>a</sup> | 25.89±1.25 <sup>c</sup>  | 27.48±0.80 <sup>bc</sup> | 28.99±0.65 <sup>c</sup> | 31.94±2.14 <sup>c</sup> | 33.89±1.39 <sup>c</sup> |
| HFDL  | 21.90 ±0.91 <sup>a</sup> | 25.26±0.73 <sup>bc</sup> | 27.59±1.16 <sup>c</sup>  | 28.42±0.77 <sup>c</sup> | 30.01±0.42 <sup>b</sup> | 31.20±0.95 <sup>b</sup> |
| HFDH  | 21.83 ±0.63 <sup>a</sup> | 24.87±0.77 <sup>bc</sup> | 26.50±0.63 <sup>b</sup>  | 27.53±0.58 <sup>b</sup> | 29.52±0.66 <sup>b</sup> | 30.45±0.74 <sup>b</sup> |

Data expressed as mean ± standard deviation (n = 7). Means with different letters in each column were significantly different at  $p < 0.05$ .

## References for supplementary information

1. A.-M. Reissner, S. Al-Hamimi, A. Quiles, C. Schmidt, S. Struck, I. Hernando, C. Turner and H. Rohm, Composition and physicochemical properties of dried berry pomace, *J. Sci. Food Agric.*, 2019, **99**, 1284-1293.
2. H. Kim, G. E. Bartley, A. M. Rimando and W. Yokoyama, Hepatic gene expression related to lower plasma cholesterol in hamsters fed high-fat diets supplemented with blueberry peels and peel extract, *J. Agric. Food Chem.*, 2010, **58**, 3984-3991.
3. L. Feng, Y. Zhou, T. J. Ashaolu, F. Ye and G. Zhao, Physicochemical and rheological characterization of pectin-rich fraction from blueberry (*Vaccinium ashei*) wine pomace, *Int. J. Biol. Macromol.*, 2019, **128**, 629-637.
4. G. Chang, Y. Shi, G. Le, Z. Xu, J. Sun and J. Li, Effects of *Lactobacillus plantarum* on genes expression pattern in mice jejunal Peyer's patches, *Cell Immunol.*, 2009, **258**, 1-8.
5. K. Wang, X. Jin, Y. Chen, Z. Song, X. Jiang, F. Hu, M. A. Conlon and D. L. Topping, Polyphenol-rich propolis extracts strengthen intestinal barrier function by activating AMPK and ERK Signaling, *Nutrients*, 2016, **8**, 272.
6. K. Gil-Cardoso, I. Gines, M. Pinent, A. Ardevol, M. Blay and X. Terra, The co-administration of proanthocyanidins and an obesogenic diet prevents the increase in intestinal permeability and metabolic endotoxemia derived to the diet, *J. Nutr. Biochem.*, 2018, **62**, 35-42.
